# Supplementary material for: Online Fake News about Food: Self-Evaluation, Social Influence, and the Stages of Change Moderation
Source: PubMed Central journal article supplement (PMC8001592; doi:10.3390/ijerph18062934), 2021-03-12
Supplement: ijerph-18-02934-s001.pdf [file ijerph-18-02934-s001.pdf]

# QUESTIONNAIRE

## Gender

- Male
- Female

## Year of birth

## Region of residence

- Abruzzo
- Basilicata
- Calabria
- Campania
- Emilia Romagna
- Friuli Venezia Giulia
- Lazio
- Liguria
- Lombardia
- Marche
- Molise
- Piemonte
- Puglia
- Sardegna
- Sicilia
- Toscana
- Trentino Alto Adige
- Umbria
- Valle d'Aosta
- Veneto

## Residence municipality size

- Up to 10000 inhabitants
- 10/30.000 inhabitants
- 30/100.000 inhabitants
- More than 100.000,
- I don't know

## **Employment**

- Employed
- Not employed
- Retired

## **Level of education**

- No educational qualifications
- Elementary license
- Lower secondary school leaving certificate
- High school diploma
- Degree

## **Are you the main household food purchaser?**

- Yes, just me
- Yes, with others
- No

## **How interested are you in making your lifestyle healthier than it is now?**

- I'm not interested in changing my lifestyle at the moment
- I plan to make changes in my lifestyle in the next 6 months
- I plan to make changes in my lifestyle this month
- I recently started making changes in my lifestyle
- I believe I already have a healthy lifestyle

## **In the last year have you believed in a piece of news about food read on Internet or on social networks that turned out to be a fake news (Fake News)?**

- Never
- Rarely
- Sometimes
- Often
- Always

**Indicate your degree of agreement with the following statements from 1 to 7 where:**

**(1 = Strongly disagree and 7=Strongly agree)**

|                                                                                             | 1 Strongly disagree      | 2                        | 3                        | 4 Neither agree or disagree | 5                        | 6                        | 7 Strongly agree         |
|---------------------------------------------------------------------------------------------|--------------------------|--------------------------|--------------------------|-----------------------------|--------------------------|--------------------------|--------------------------|
| When buying products, I generally purchase those brands that I think others will approve of | <input type="checkbox"/> | <input type="checkbox"/> | <input type="checkbox"/> | <input type="checkbox"/>    | <input type="checkbox"/> | <input type="checkbox"/> | <input type="checkbox"/> |
| It is important that others like the products and brands I buy.                             | <input type="checkbox"/> | <input type="checkbox"/> | <input type="checkbox"/> | <input type="checkbox"/>    | <input type="checkbox"/> | <input type="checkbox"/> | <input type="checkbox"/> |
| If I have little experience with a product, I often ask my friends about the product.       | <input type="checkbox"/> | <input type="checkbox"/> | <input type="checkbox"/> | <input type="checkbox"/>    | <input type="checkbox"/> | <input type="checkbox"/> | <input type="checkbox"/> |
| I frequently gather information from friends or family about a product before I buy.        | <input type="checkbox"/> | <input type="checkbox"/> | <input type="checkbox"/> | <input type="checkbox"/>    | <input type="checkbox"/> | <input type="checkbox"/> | <input type="checkbox"/> |

**Indicate your degree of agreement with the following statements from 1 to 7 where:**

(1 = Strongly disagree, 2 = Disagree, 3 = Neither agree or disagree, 4 = Agree, 5 = Strongly agree)

|                                                     | 1 Strongly disagree      | 2 disagree               | 3 Neither agree or disagree | 4 Agree                  | 5 Strongly agree         |
|-----------------------------------------------------|--------------------------|--------------------------|-----------------------------|--------------------------|--------------------------|
| I'm sure I get the success I deserve in life        | <input type="checkbox"/> | <input type="checkbox"/> | <input type="checkbox"/>    | <input type="checkbox"/> | <input type="checkbox"/> |
| Sometimes I feel sad and upset                      | <input type="checkbox"/> | <input type="checkbox"/> | <input type="checkbox"/>    | <input type="checkbox"/> | <input type="checkbox"/> |
| When I try, I generally succeed                     | <input type="checkbox"/> | <input type="checkbox"/> | <input type="checkbox"/>    | <input type="checkbox"/> | <input type="checkbox"/> |
| Sometimes when I fail I feel like I'm worth nothing | <input type="checkbox"/> | <input type="checkbox"/> | <input type="checkbox"/>    | <input type="checkbox"/> | <input type="checkbox"/> |
| I successfully complete my assignments              | <input type="checkbox"/> | <input type="checkbox"/> | <input type="checkbox"/>    | <input type="checkbox"/> | <input type="checkbox"/> |
| Sometimes, I feel like I'm not in control of my job | <input type="checkbox"/> | <input type="checkbox"/> | <input type="checkbox"/>    | <input type="checkbox"/> | <input type="checkbox"/> |
| Overall, I am satisfied with myself                 | <input type="checkbox"/> | <input type="checkbox"/> | <input type="checkbox"/>    | <input type="checkbox"/> | <input type="checkbox"/> |
| I am full of doubts about my competence             | <input type="checkbox"/> | <input type="checkbox"/> | <input type="checkbox"/>    | <input type="checkbox"/> | <input type="checkbox"/> |

|                                                                       | 1 Strongly disagree      | 2 disagree               | 3 Neither agree or disagree | 4 Agree                  | 5 Strongly agree         |
|-----------------------------------------------------------------------|--------------------------|--------------------------|-----------------------------|--------------------------|--------------------------|
| I determine what will happen in my life                               | <input type="checkbox"/> | <input type="checkbox"/> | <input type="checkbox"/>    | <input type="checkbox"/> | <input type="checkbox"/> |
| I feel like I am not in control of my success in my career            | <input type="checkbox"/> | <input type="checkbox"/> | <input type="checkbox"/>    | <input type="checkbox"/> | <input type="checkbox"/> |
| I am able to deal with most of my problems                            | <input type="checkbox"/> | <input type="checkbox"/> | <input type="checkbox"/>    | <input type="checkbox"/> | <input type="checkbox"/> |
| There are times when things seem rather depressing and hopeless to me | <input type="checkbox"/> | <input type="checkbox"/> | <input type="checkbox"/>    | <input type="checkbox"/> | <input type="checkbox"/> |

**In which of these classes does your / your family's monthly net income fall?**

- Up to 600 euro
- 601-900 euro
- 901-1200 euro
- 1201-1500 euro
- 1501-1800 euro
- 1801-2550 euro
- 2551-3550 euro
- More then 3550 euro
- I prefer not to answer
